# Supplementary material for: Oligodendrocytes produce amyloid-β and contribute to plaque formation alongside neurons in Alzheimer’s disease model mice
Source: PubMed Central journal article supplement (PMC11374705; doi:10.1038/s41593-024-01730-3), 2024-08-05

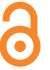

---

# Oligodendrocytes produce amyloid- $\beta$ and contribute to plaque formation alongside neurons in Alzheimer's disease model mice

---

In the format provided by the authors and unedited

---

# Raw immunoblots from Extended Data Fig 5g

## Cortex blot 1

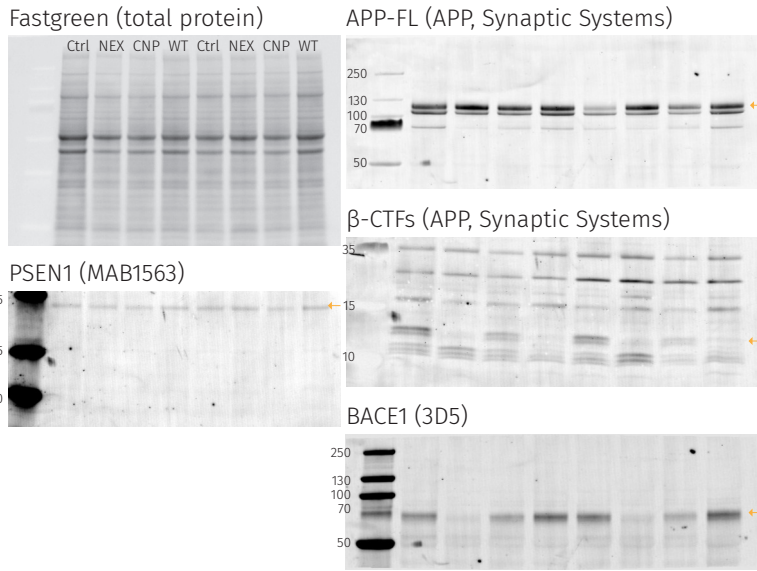

## White matter blot 1

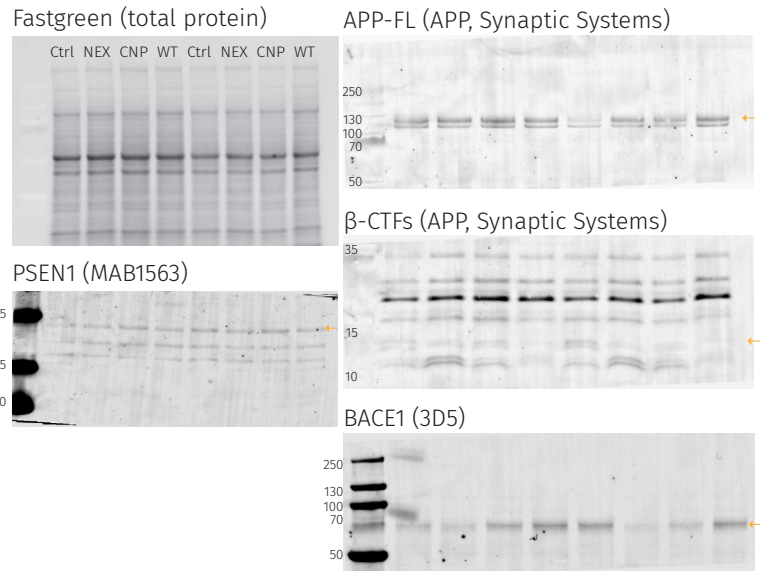

## Cortex blot 2

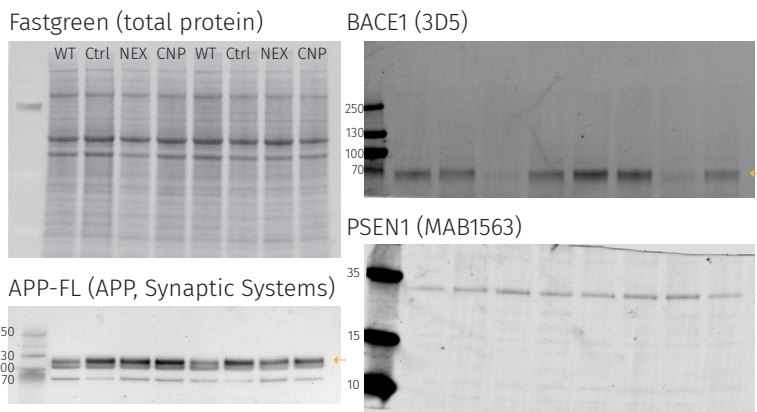

## White matter blot 2

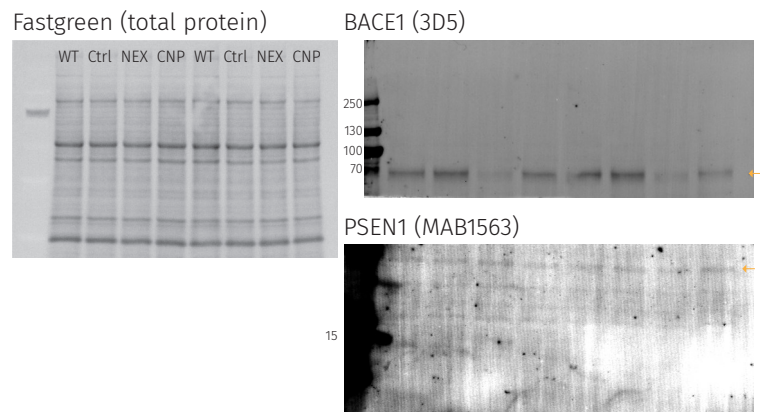

## Cortex blot 3

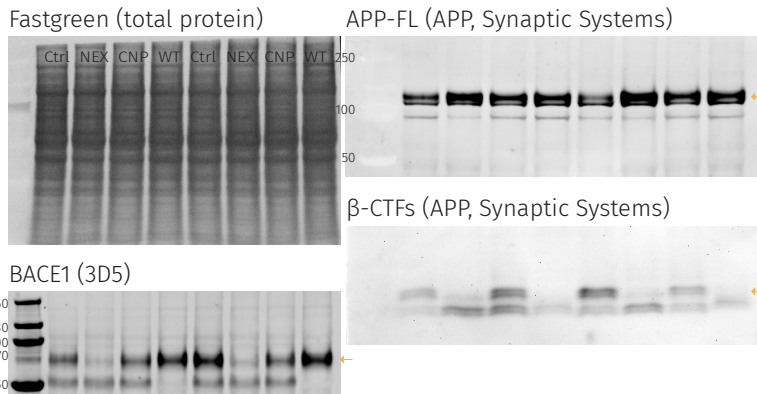

## White matter blot 3

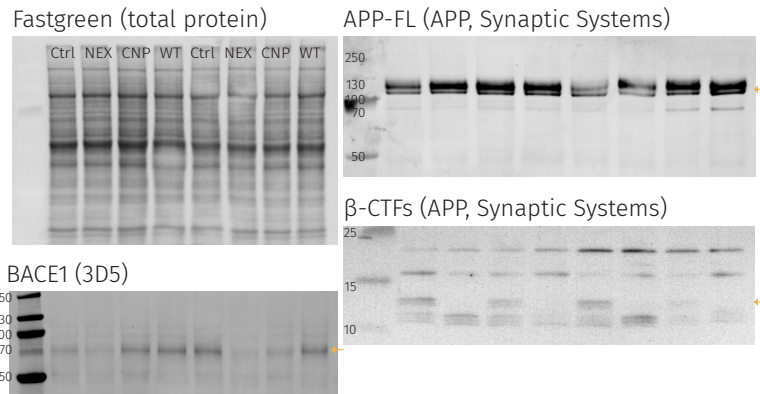

# Raw immunoblot from Extended Data Fig 5e

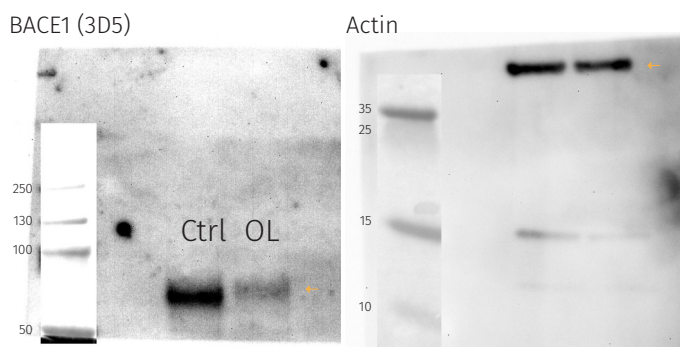

# Raw immunoblot from Extended Data Fig 8g

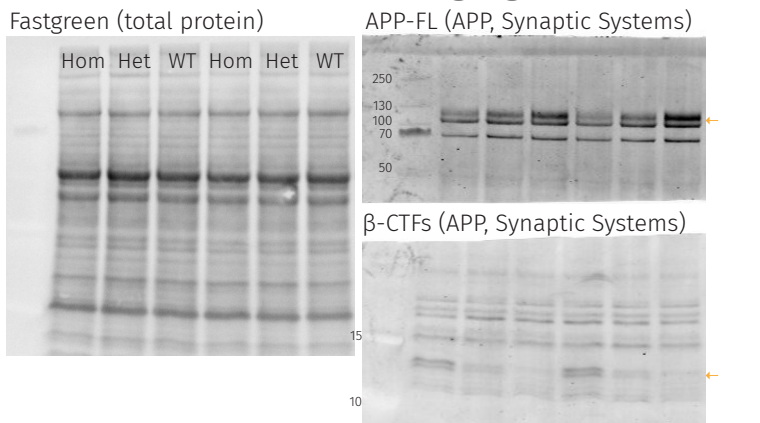

Supplement: 41593_2024_1730_MOESM1_ESM.pdf [file 41593_2024_1730_MOESM1_ESM.pdf]
